# Supplementary material for: Brisk walking compared with an individualised medical fitness programme for patients with type 2 diabetes: a randomised controlled trial
Source: Springer Nature journal article supplement (doi:10.1007/s00125-008-0950-y), 2008-02-22
Supplement: MOESM3 [file 8087540]

**ESM Table 3** Changes in diabetes outcome in long-term active participants

| Variable                               | Baseline   |    | 12 months  |    | Change from baseline to 12 months |               | p value |
|----------------------------------------|------------|----|------------|----|-----------------------------------|---------------|---------|
|                                        | Mean±SD    | n  | Mean±SD    | n  | Difference                        | 95% CI        |         |
| <b>HbA<sub>1c</sub> (%)</b>            |            |    |            |    |                                   |               |         |
| Total                                  | 7.06±1.35  | 46 | 6.89±1.30  | 42 |                                   |               |         |
| Brisk walking group                    | 6.79±1.16  | 23 | 6.88±1.35  | 21 |                                   |               |         |
| Medical fitness group                  | 7.33±1.49  | 23 | 6.89±1.28  | 21 |                                   |               |         |
| Intragroup comparisons                 |            |    |            |    |                                   |               |         |
| Intragroup comparison total            |            |    |            |    | -0.17                             | -0.41, 0.07   | 0.160   |
| Intragroup comparison brisk walking    |            |    |            |    | 0.10                              | -0.30, 0.49   | 0.622   |
| Intragroup comparison medical fitness  |            |    |            |    | -0.44                             | -0.70, -0.18  | 0.002   |
| Brisk walking vs medical fitness       |            |    |            |    | 0.53                              | 0.07, 1.00    | 0.025   |
| <b>BMI (kg/m<sup>2</sup>)</b>          |            |    |            |    |                                   |               |         |
| Total                                  | 31.9±5.1   | 46 | 31.9±5.3   | 45 |                                   |               |         |
| Brisk walking group                    | 31.7±5.0   | 23 | 32.0±4.7   | 23 |                                   |               |         |
| Medical fitness group                  | 32.1±5.2   | 23 | 31.9±5.9   | 22 |                                   |               |         |
| Intragroup comparisons                 |            |    |            |    |                                   |               |         |
| Intragroup comparison total            |            |    |            |    | 0.06                              | -0.51, 0.63   | 0.823   |
| Intragroup comparison brisk walking    |            |    |            |    | 0.31                              | -0.30, 0.92   | 0.303   |
| Intragroup comparison medical fitness  |            |    |            |    | -0.18                             | -1.19, 0.83   | 0.711   |
| Brisk walking vs medical fitness       |            |    |            |    | 0.49                              | -0.65, 1.64   | 0.391   |
| <b>Fasting plasma glucose (mmol/l)</b> |            |    |            |    |                                   |               |         |
| Total                                  | 8.47±3.15  | 46 | 7.98±2.37  | 42 |                                   |               |         |
| Brisk walking group                    | 8.10±2.94  | 23 | 7.94±2.78  | 21 |                                   |               |         |
| Medical fitness group                  | 8.83±3.37  | 23 | 8.02±1.94  | 21 |                                   |               |         |
| Intragroup comparisons                 |            |    |            |    |                                   |               |         |
| Intragroup comparison total            |            |    |            |    | -0.49                             | -1.21, 0.23   | 0.180   |
| Intragroup comparison brisk walking    |            |    |            |    | -0.16                             | -1.15, 0.83   | 0.739   |
| Intragroup comparison medical fitness  |            |    |            |    | -0.81                             | -1.92, 0.30   | 0.143   |
| Brisk walking vs medical fitness       |            |    |            |    | 0.65                              | -0.79, 2.10   | 0.368   |
| <b>HOMA <sup>§</sup></b>               |            |    |            |    |                                   |               |         |
| Total                                  | 5.04±2.88  | 34 | 5.30±3.23  | 33 |                                   |               |         |
| Brisk walking group                    | 5.51±3.21  | 18 | 6.01±3.63  | 18 |                                   |               |         |
| Medical fitness group                  | 4.57±2.48  | 16 | 4.52±2.64  | 15 |                                   |               |         |
| Intragroup comparisons                 |            |    |            |    |                                   |               |         |
| Intragroup comparison total            |            |    |            |    | 0.22                              | -0.55, 1.00   | 0.564   |
| Intragroup comparison brisk walking    |            |    |            |    | 0.49                              | -0.94, 1.93   | 0.481   |
| Intragroup comparison medical fitness  |            |    |            |    | -0.05                             | -0.79, 0.70   | 0.898   |
| Brisk walking vs medical fitness       |            |    |            |    | 0.54                              | -1.03, 2.11   | 0.490   |
| <b>Resting heart rate (bpm)</b>        |            |    |            |    |                                   |               |         |
| Total                                  | 72.7±10.7  | 46 | 67.5±10.7  | 44 |                                   |               |         |
| Brisk walking group                    | 71.1±10.0  | 23 | 65.7±10.9  | 22 |                                   |               |         |
| Medical fitness group                  | 74.2±11.3  | 23 | 69.3±10.3  | 22 |                                   |               |         |
| Intragroup comparisons                 |            |    |            |    |                                   |               |         |
| Intragroup comparison total            |            |    |            |    | -5.2                              | -7.6, -2.8    | 0.000   |
| Intragroup comparison brisk walking    |            |    |            |    | -5.4                              | -8.5, -2.4    | 0.001   |
| Intragroup comparison medical fitness  |            |    |            |    | -4.9                              | -8.8, -1.1    | 0.015   |
| Brisk walking vs medical fitness       |            |    |            |    | -0.5                              | -5.3, 4.3     | 0.834   |
| <b>Systolic blood pressure (mmHg)</b>  |            |    |            |    |                                   |               |         |
| Total                                  | 149.9±16.0 | 46 | 136.8±13.9 | 44 |                                   |               |         |
| Brisk walking group                    | 151.1±17.1 | 23 | 135.1±15.5 | 22 |                                   |               |         |
| Medical fitness group                  | 148.7±15.2 | 23 | 138.6±12.3 | 22 |                                   |               |         |
| Intragroup comparisons                 |            |    |            |    |                                   |               |         |
| Intragroup comparison total            |            |    |            |    | -13.06                            | -17.61, -8.52 | 0.000   |
| Intragroup comparison brisk walking    |            |    |            |    | -15.97                            | -23.21, -8.74 | 0.000   |
| Intragroup comparison medical fitness  |            |    |            |    | -10.15                            | -15.97, -4.34 | 0.002   |
| Brisk walking vs medical fitness       |            |    |            |    | -5.82                             | -14.84, 3.20  | 0.200   |
| <b>Diastolic blood pressure (mmHg)</b> |            |    |            |    |                                   |               |         |
| Total                                  | 81.1±9.0   | 46 | 74.8±8.6   | 44 |                                   |               |         |
| Brisk walking group                    | 80.5±8.9   | 23 | 73.1±8.3   | 22 |                                   |               |         |
| Medical fitness group                  | 81.7±9.3   | 23 | 76.6±8.6   | 22 |                                   |               |         |
| Intragroup comparisons                 |            |    |            |    |                                   |               |         |
| Intragroup comparison total            |            |    |            |    | -6.21                             | -8.49, -3.94  | 0.000   |
| Intragroup comparison brisk walking    |            |    |            |    | -7.39                             | -10.44, -4.35 | 0.000   |
| Intragroup comparison medical fitness  |            |    |            |    | -5.03                             | -8.59, -1.48  | 0.008   |
| Brisk walking vs medical fitness       |            |    |            |    | -2.36                             | -6.90, 2.19   | 0.302   |

|                                       |           |    |           |    |       |             |       |
|---------------------------------------|-----------|----|-----------|----|-------|-------------|-------|
| Total cholesterol level (mmol/l)      |           |    |           |    |       |             |       |
| Total                                 | 4.54±0.78 | 45 | 4.39±0.90 | 41 |       |             |       |
| Brisk walking group                   | 4.52±0.74 | 23 | 4.40±0.78 | 21 |       |             |       |
| Medical fitness group                 | 4.56±0.84 | 22 | 4.39±1.01 | 20 |       |             |       |
| Intragroup comparisons                |           |    |           |    |       |             |       |
| Intragroup comparison total           |           |    |           |    | -0.14 | -0.35, 0.06 | 0.169 |
| Intragroup comparison brisk walking   |           |    |           |    | -0.12 | 0.42, 0.19  | 0.435 |
| Intragroup comparison medical fitness |           |    |           |    | -0.17 | -0.47, 0.13 | 0.258 |
| Brisk walking vs medical fitness      |           |    |           |    | 0.05  | -0.37, 0.47 | 0.803 |
| LDL-cholesterol level (mmol/l)        |           |    |           |    |       |             |       |
| Total                                 | 2.70±0.71 | 45 | 2.56±0.75 | 41 |       |             |       |
| Brisk walking group                   | 2.63±0.75 | 23 | 2.52±0.77 | 21 |       |             |       |
| Medical fitness group                 | 2.76±0.68 | 22 | 2.60±0.73 | 20 |       |             |       |
| Intragroup comparisons                |           |    |           |    |       |             |       |
| Intragroup comparison total           |           |    |           |    | -0.14 | -0.31, 0.03 | 0.114 |
| Intragroup comparison brisk walking   |           |    |           |    | -0.12 | -0.37, 0.14 | 0.350 |
| Intragroup comparison medical fitness |           |    |           |    | -0.16 | -0.40, 0.09 | 0.205 |
| Brisk walking vs medical fitness      |           |    |           |    | 0.04  | -0.31, 0.38 | 0.821 |
| HDL-cholesterol level (mmol/l)        |           |    |           |    |       |             |       |
| Total                                 | 1.11±0.30 | 45 | 1.11±0.30 | 41 |       |             |       |
| Brisk walking group                   | 1.11±0.21 | 23 | 1.08±0.27 | 21 |       |             |       |
| Medical fitness group                 | 1.10±0.34 | 22 | 1.13±0.32 | 20 |       |             |       |
| Intragroup comparisons                |           |    |           |    |       |             |       |
| Intragroup comparison total           |           |    |           |    | 0.00  | -0.06, 0.06 | 0.943 |
| Intragroup comparison brisk walking   |           |    |           |    | -0.03 | -0.13, 0.07 | 0.595 |
| Intragroup comparison medical fitness |           |    |           |    | 0.03  | -0.04, 0.10 | 0.404 |
| Brisk walking vs medical fitness      |           |    |           |    | -0.06 | -0.18, 0.06 | 0.353 |
| Triacylglycerol level (mmol/l)        |           |    |           |    |       |             |       |
| Total                                 | 1.77±1.00 | 45 | 1.73±1.01 | 41 |       |             |       |
| Brisk walking group                   | 1.86±1.06 | 23 | 1.91±1.16 | 21 |       |             |       |
| Medical fitness group                 | 1.69±0.95 | 22 | 1.54±0.82 | 20 |       |             |       |
| Intragroup comparisons                |           |    |           |    |       |             |       |
| Intragroup comparison total           |           |    |           |    | -0.04 | -3.05, 4.17 | 0.737 |
| Intragroup comparison brisk walking   |           |    |           |    | -0.06 | -0.39, 0.50 | 0.796 |
| Intragroup comparison medical fitness |           |    |           |    | -0.14 | -0.44, 0.15 | 0.328 |
| Brisk walking vs medical fitness      |           |    |           |    | 0.20  | -0.32, 0.72 | 0.444 |
| RAND-36 (score 0–100 scale)           |           |    |           |    |       |             |       |
| Total                                 | 70±7      | 45 | 70±7      | 37 |       |             |       |
| Brisk walking group                   | 66±6      | 22 | 66±6      | 18 |       |             |       |
| Medical fitness group                 | 73±7      | 23 | 74±6      | 19 |       |             |       |
| Intragroup comparisons                |           |    |           |    |       |             |       |
| Intragroup comparison total           |           |    |           |    | 0.20  | -2.6, 3.0   | 0.886 |
| Intragroup comparison brisk walking   |           |    |           |    | -0.55 | -5.5, 4.4   | 0.821 |
| Intragroup comparison medical fitness |           |    |           |    | 0.94  | -1.9, 3.8   | 0.496 |
| Brisk walking vs medical fitness      |           |    |           |    | -1.49 | -7.0, 4.1   | 0.591 |

Long-term physiological response and health-related quality of life score (RAND-36) following brisk walking vs medical fitness programme in 23 vs 23 participants respectively, who had been actively participating in either programme for 10 months or longer. Data are means±SD. *n*=number of valid measurements.
